# Supplementary material for: Poly(2-aminothiazole) as a unique precursor for nitrogen and sulfur co-doped porous carbon: immobilization of very small gold nanoparticles and its catalytic application
Source: Royal Society of Chemistry journal article supplement (doi:10.1039/c5ra09272h), 2015-01-01
Supplement: c5ra09272h1.pdf [file c5ra09272h1.pdf]

## Supporting Information

# **Poly(2-aminothiazole) as a unique precursor for nitrogen and sulfur co-doped porous carbon: Immobilization of very small gold nanoparticles and its catalytic application**

*Yasamin Bide, Mohammad Reza Nabid\* and Fateme Dastar*

### **FT-IR analysis**

FT-IR spectra of 2AT, P2AT, and (N, S)-PCM were given in Fig. S1, respectively. The bands at 3415 and 3292  $\text{cm}^{-1}$  in the spectrum of 2AT are related to the asymmetrical and symmetrical N–H stretching modes of the  $-\text{NH}_2$  group, respectively. The single broad band of N–H stretching at 3397  $\text{cm}^{-1}$  in the spectrum of P2AT showed the formation of  $-\text{N}(\text{H})-$  linkages, due to the reaction of  $-\text{NH}_2$  group during polymerization. The peak at 1626  $\text{cm}^{-1}$  in the FT-IR spectrum of 2AT and 1621  $\text{cm}^{-1}$  in the spectrum of P2AT are ascribed to the C=N stretching bands. The absorption bands at 695 and 618  $\text{cm}^{-1}$  in the spectra of 2AT and P2AT, respectively, are related to the C–S stretching vibration.

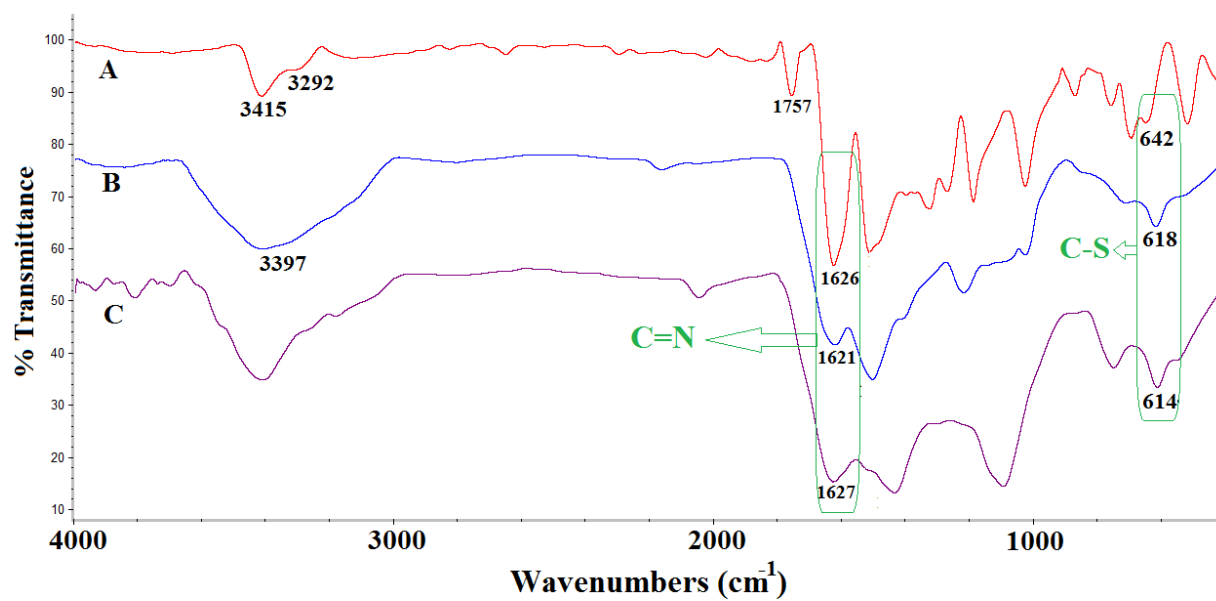

**Fig. S1** FT-IR spectra of 2AT (A), P2AT (B) and (N, S)-PCM (C).

### DTG analysis

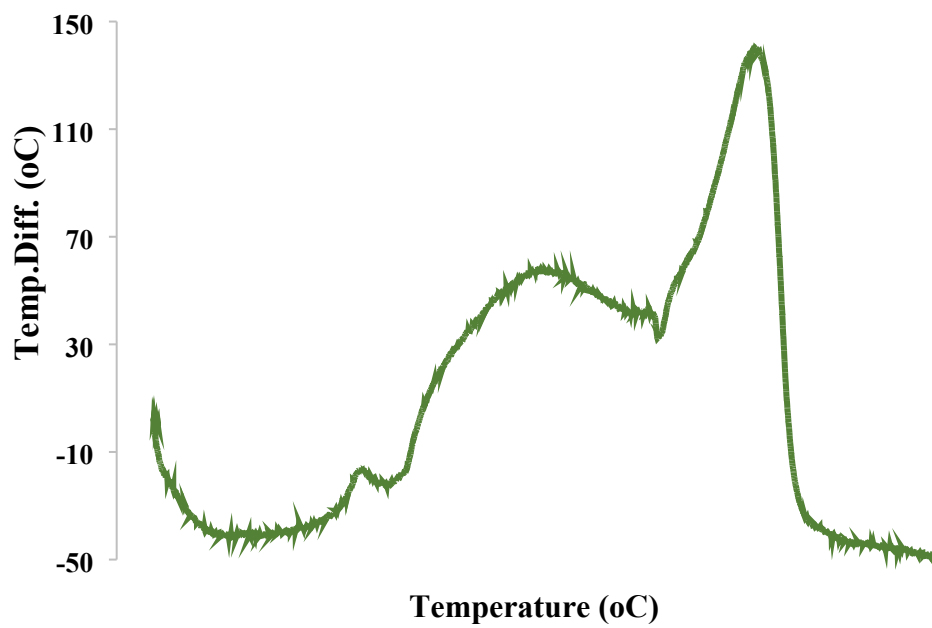

**Fig. S2** DTA curve of P2AT.

## BET analysis

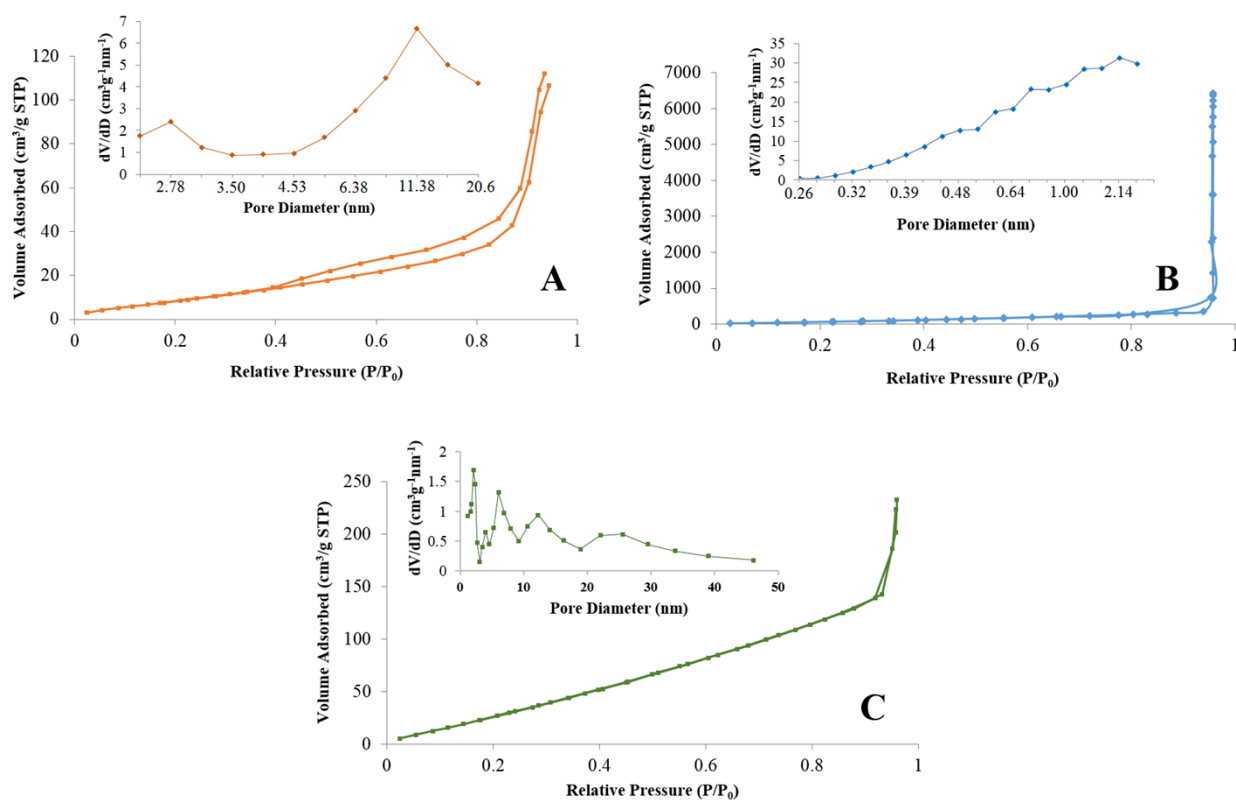

**Fig. S3** Nitrogen adsorption isotherms of P2AT (A), (N, S)-PCM (B), and AuNPs@(N, S)-PCM (C). The inset shows the pore-size distribution obtained from adsorption branch using the BJH method.

## UV-Vis spectra

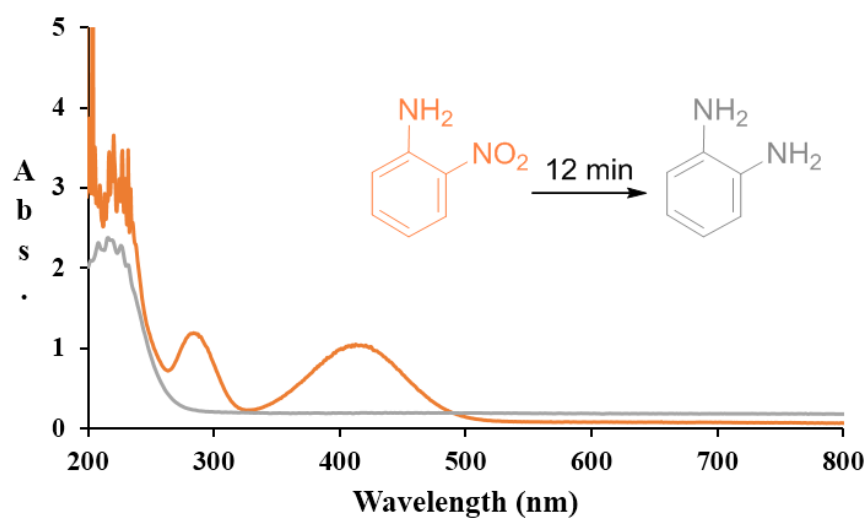

**Fig. S4** UV-vis absorption spectra for the catalytic reduction of 2-nitroaniline by  $\text{NaBH}_4$  in the presence of  $\text{AuNPs}@\text{(N, S)-PCM}$  as the catalyst.

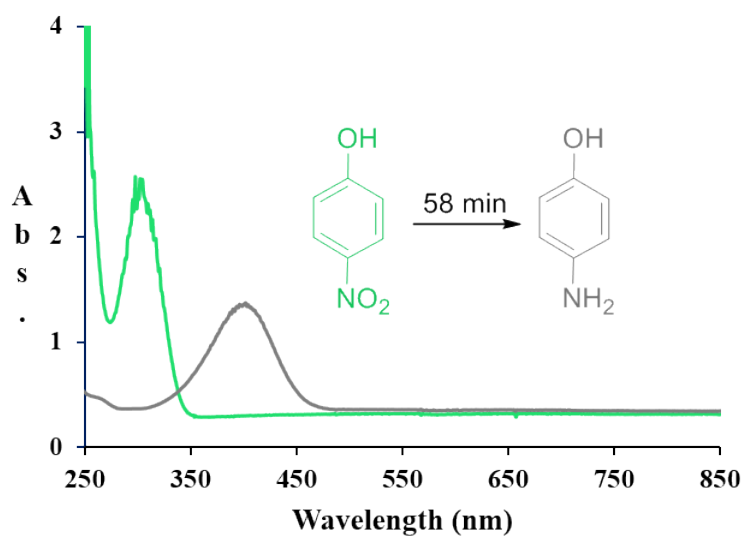

**Fig. S5** UV-vis absorption spectra for the catalytic reduction of 4-nitrophenol by  $\text{NaBH}_4$  in the presence of  $\text{AuNPs}@\text{(N, S)-PCM}$  as the catalyst.

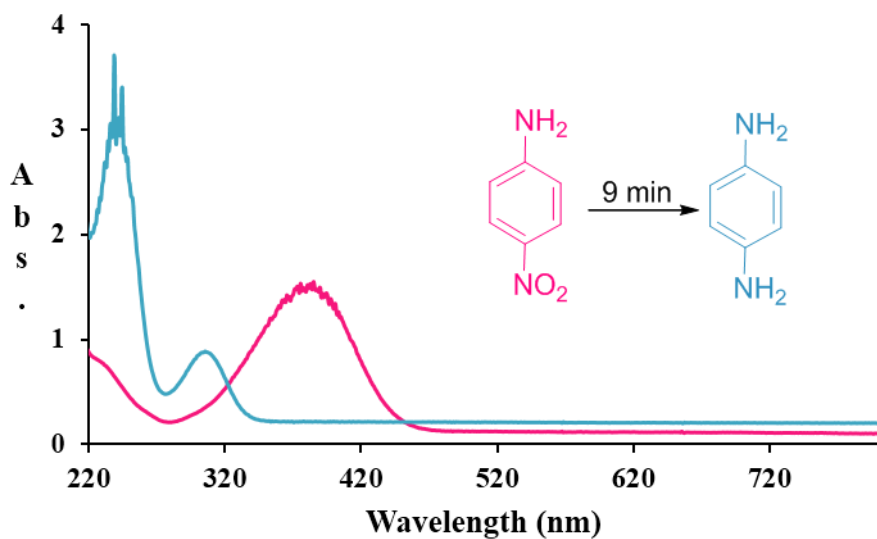

**Fig. S6** UV-vis absorption spectra for the catalytic reduction of 4-nitroaniline by  $\text{NaBH}_4$  in the presence of  $\text{AuNPs}@(\text{N}, \text{S})\text{-PCM}$  as the catalyst.

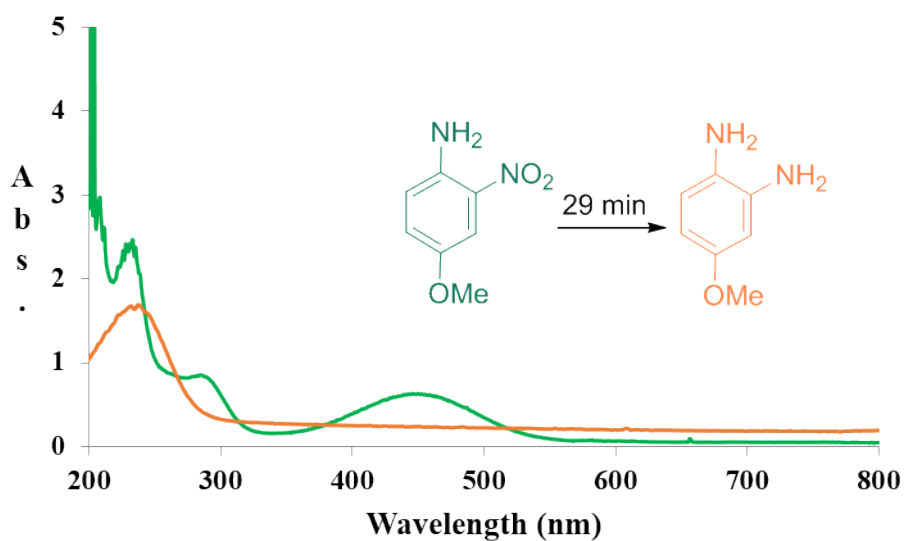

**Fig. S7** UV-vis absorption spectra for the catalytic reduction of 4-methoxy-2-nitroaniline by  $\text{NaBH}_4$  in the presence of  $\text{AuNPs}@(\text{N}, \text{S})\text{-PCM}$  as the catalyst.

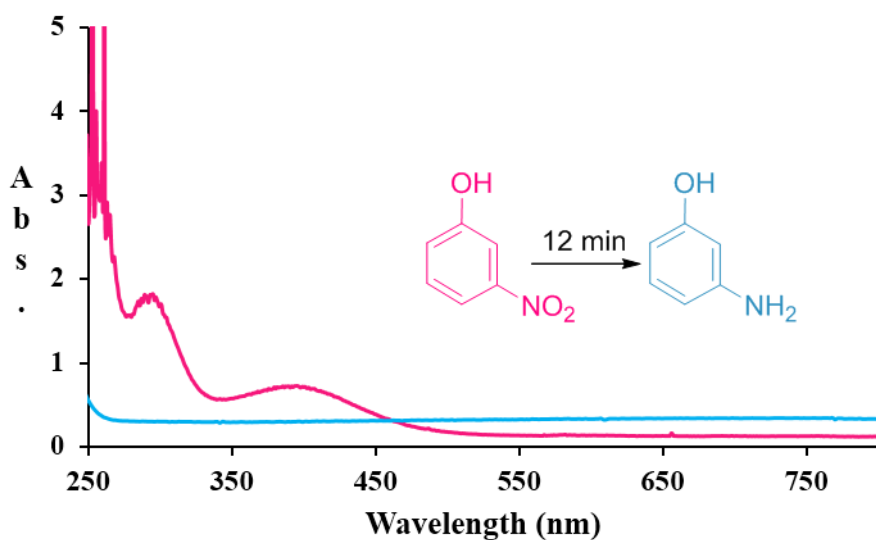

**Fig. S8** UV-vis absorption spectra for the catalytic reduction of 3-nitrophenol by  $\text{NaBH}_4$  in the presence of  $\text{AuNPs}@(\text{N}, \text{S})\text{-PCM}$  as the catalyst.

**Table S1** Comparison of various AuNPs catalysts of 2NA reduction with  $\text{NaBH}_4$  as reducing agent.

| Entry    | Details of catalysts <sup>Ref</sup>                                                                         | mol% Au<br>(mol Au/mol<br>2NA×100) | $\text{NaBH}_4$<br>(mmol) | Time<br>(min) |
|----------|-------------------------------------------------------------------------------------------------------------|------------------------------------|---------------------------|---------------|
| 1        | AuNPs on Graphene oxide <sup>1</sup>                                                                        | 2.2                                | 0.36                      | 1             |
| 2        | AuNPs on Silica nanorattles <sup>2</sup>                                                                    | 3.17                               | 0.2                       | 21            |
| 3        | AuNPs on amino-functionalized silica nanoparticles with center-radially hierarchical mesopores <sup>3</sup> | 0.67                               | 0.06                      | 6             |
| 4        | AuNPs encapsulated within hollow silica nanospheres <sup>4</sup>                                            | 0.16                               | 0.3                       | 22            |
| 5        | $\text{Au}@(\text{SiO}_2)$ yolk-shell nanoreactors <sup>5</sup>                                             | 21.8                               | 1.2                       | 20            |
| <b>6</b> | <b>This work</b>                                                                                            | <b>0.63</b>                        | <b>0.02</b>               | <b>12</b>     |

## Recyclability

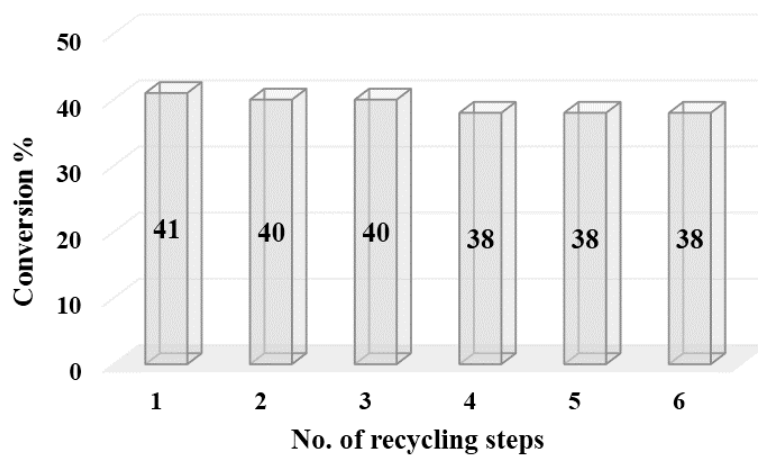

**Fig. S9** Effect of recycling on the catalytic activity of AuNPs@(N, S)-PCM after 4 min.

## References

1. N. T. Khoa, S. W. Kim, D.-H. Yoo, E. J. Kim and S. H. Hahn, *Appl. Catal., A*, 2014, **469**, 159-164.
2. L. Tan, D. Chen, H. Liu and F. Tang, *Adv. Mater.*, 2010, **22**, 4885-4889.
3. X. Du and J. He, *Nanoscale*, 2012, **4**, 852-859.
4. X. Du, L. Yao and J. He, *Chem. Eur. J.*, 2012, **18**, 7878-7885.
5. J. Lee, J. C. Park, J. U. Bang and H. Song, *Chem. Mater.*, 2008, **20**, 5839-5844.
